# Supplementary material
Source: PubMed Central journal article supplement (PMC1976585)
Supplement: plntphys_pp.107.104000_1.pdf [file plntphys_pp.107.104000_1.pdf]

**Supplemental Table S1.** Primer combinations used for the map-based cloning of *mtkas-1*. The marker positions on chromosome II are indicated by the respective BAC clones. Expected fragment lengths and the sizes of the restriction fragments including the restriction enzyme for CAPS markers are indicated. Except *er*, *ve017*, and *m246* (TAIR; www.arabidopsis.org), markers were designed using information from the Monsanto LER sequence collection (Jander *et al.*, 2002).

| Marker             | BAC    | Primer 1                        | Primer 2                      | Enzyme         | Fragment length (bp) |            |
|--------------------|--------|---------------------------------|-------------------------------|----------------|----------------------|------------|
|                    |        |                                 |                               |                | Col-0                | Ler        |
| <i>er</i>          | T1D16  | 5'-GAGTTTATTCTGTGCCAAGTCCCTG    | 5'-CTAATGTAGTGATCTGCGAGGTAATC | <i>Dde</i> I   | 550                  | 360 & 140  |
| <i>ve017</i>       | T1J8   | 5'-GAGCAATCCAGTAGAGGATA         | 5'-CTTGAAGCTTAAATCTCAGC       | <i>Pst</i> I   | 214 & 143            | 357        |
| <i>m246</i>        | F19B11 | 5'-GCTTGAACTCCTCCTCCTTC         | 5'-TGAAGAGCTATCCGAGATGG       | <i>Mae</i> III | 1354                 | 1122 & 232 |
| <i>CER452464</i>   | F5G3   | 5'-GATCGGTCTGAAATCCTGCATCAG     | 5'-GCTACACACTACTTTTCGGGTCTG   |                | 356                  | 313        |
| <i>CER452076</i>   | F3L12  | 5'-GGTTTTATACATTTTTTTCACATGCAGG | 5'-CTGATCGGTTGATGGAATCTACTTC  |                | 215                  | 153        |
| <i>CER432474</i>   | F7D11  | 5'-GCGCCTAAAACGTTTAATCATAGTC    | 5'-CAAAGCGGTTACTAAAGTGGTCTAG  | <i>Ssp</i> I   | 347                  | 185 & 162  |
| <i>CER444776/8</i> | T23O15 | 5'-GTAGACATGGATCCATCAAATCTC     | 5'-AGAACCGGAGCTTTATGTAAAGAC   | <i>Xba</i> I   | 701                  | 555 & 146  |
