# Supplementary material
Source: PubMed Central journal article supplement (PMC1976585)
Supplement: plntphys_pp.107.104000_2.pdf [file plntphys_pp.107.104000_2.pdf]

**Supplemental Table S2.** Primers used for the detection of T-DNA insertions (T), for RT-PCR experiments (R), and for the amplification and sequencing of the mtKAS-coding region of *mtkas-1* genomic DNA (S).

| <b>Code</b> | <b>Sequence</b>                  | <b>Application</b> |
|-------------|----------------------------------|--------------------|
| R176        | 5'-GGCGACACAACCAGCTACTGA         | R                  |
| R177        | 5'-CGGTA ACTCTTCTGGTAACGA        | R                  |
| R409        | 5'-ATTAAACTCCAGAAACCCGCGGCTGAG   | T                  |
| R741        | 5'-AATCAGCTGTTGCCCGTCTCACTGGTGAA | T                  |
| R758        | 5'- ACACAAGTTTAGATAGAGGCAAAGAG   | R, T, S            |
| R759        | 5'-AAAAGTCCCATCATCGCCGTCGTCTC    | S                  |
| R790        | 5'-ATGCCAAGGTGCCTGAAGTAGCATG     | S                  |
| R791        | 5'-GTTGGTAACCACTCTGCATCTCTC      | S                  |
| R793        | 5'-AAACATGGCATCTGGTCATGTGAG      | S                  |
| R794        | 5'-GCCGTGAAGCTTCTTGTGGAGAAG      | S                  |
| R795        | 5'-CTGAGCTTTGTGGATATGGGATGTC     | T, R, S            |
| R833        | 5'-TTATTGTGAGATCGTGACTATGAAG     | T                  |
