# Supplementary material
Source: PubMed Central journal article supplement (PMC1976585)

**Supplemental Figure S1.** The *gld1* mutant (*mtkas-1*) cannot be complemented by crossing with the T-DNA knockout lines *mtkas-2* or *mtkas-3*. This picture shows F1 hybrids in comparison with wild type plants grown under identical conditions in ambient air for 50 days. Genotypes were verified by PCR with genomic DNA.

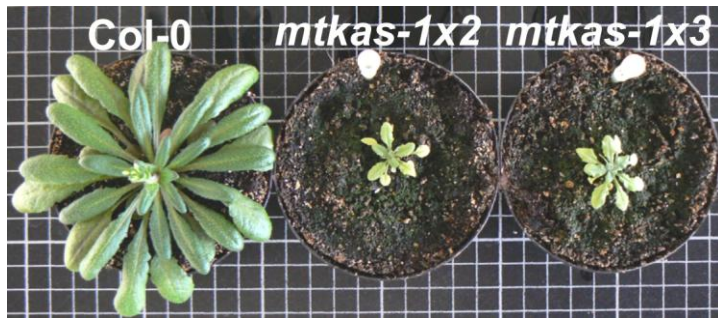

Supplement: plntphys_pp.107.104000_3.pdf [file plntphys_pp.107.104000_3.pdf]
