# Supplementary material
Source: PubMed Central journal article supplement (PMC1976585)

**Supplemental Figure S4.** Lipoylation of E2 subunits of PDH and KGDH is independent from the mtKAS pathway of lipoate biosynthesis in roots. Five  $\mu$ g mitochondrial protein and soluble proteins extracted from leaves and roots from wild type (W) and *mtkas-2* (-2) plants were separated on a 12% Tricine-SDS polyacrylamide gel and transferred to a PVDF membrane. A specific antibody which recognizes lipoylated protein domains was used for detection of the lipoylation status of PDH and KGDH E2 subunits. Identical results were obtained with *mtkas-1*, *mtkas-2*, and *mtkas-3*. Lipoylated H-protein was below detection limit in this experiment.

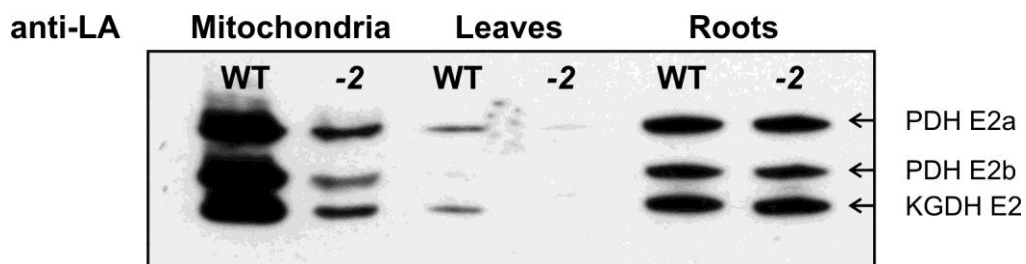

Supplement: plntphys_pp.107.104000_6.pdf [file plntphys_pp.107.104000_6.pdf]
