# Supplementary material
Source: PubMed Central journal article supplement (PMC1976585)

**Supplemental Figure S2.** Examples of original recorder traces during respiratory measurement showing deficiency in glycine oxidation. Oxygen consumption of mitochondria, corresponding to about 100 µg protein, was followed without substrate (State 1), in the presence of 12.5 glycine and after subsequent additions of 0.1 mM ADP (State 3). In the right panel, NADH was added to double-check respiratory activity.

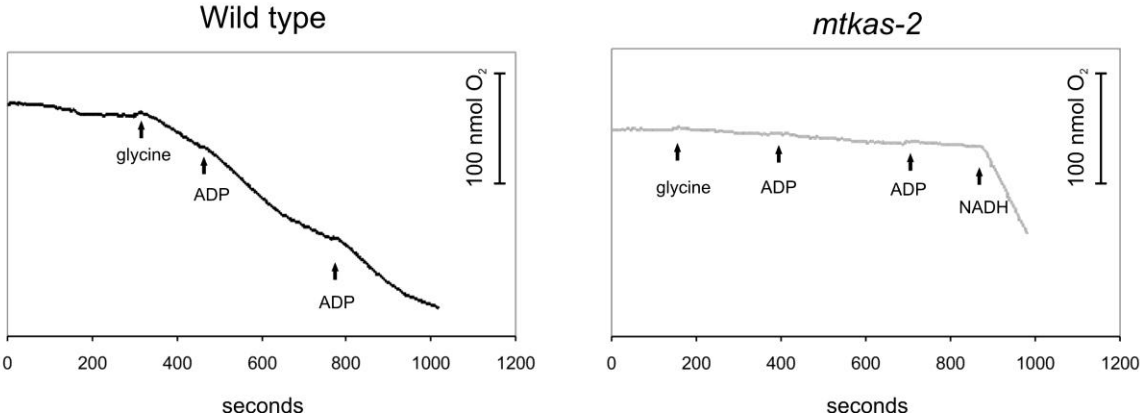

Supplement: plntphys_pp.107.104000_7.pdf [file plntphys_pp.107.104000_7.pdf]
